# Supplementary material for: Potential Toxic Levels of Cyanide in Almonds (Prunus amygdalus), Apricot Kernels (Prunus armeniaca), and Almond Syrup
Source: PubMed Central journal article supplement (PMC3793392; doi:10.1155/2013/610648), 2013-09-19
Supplement: 610648.f1.pdf [file 610648.f1.pdf]

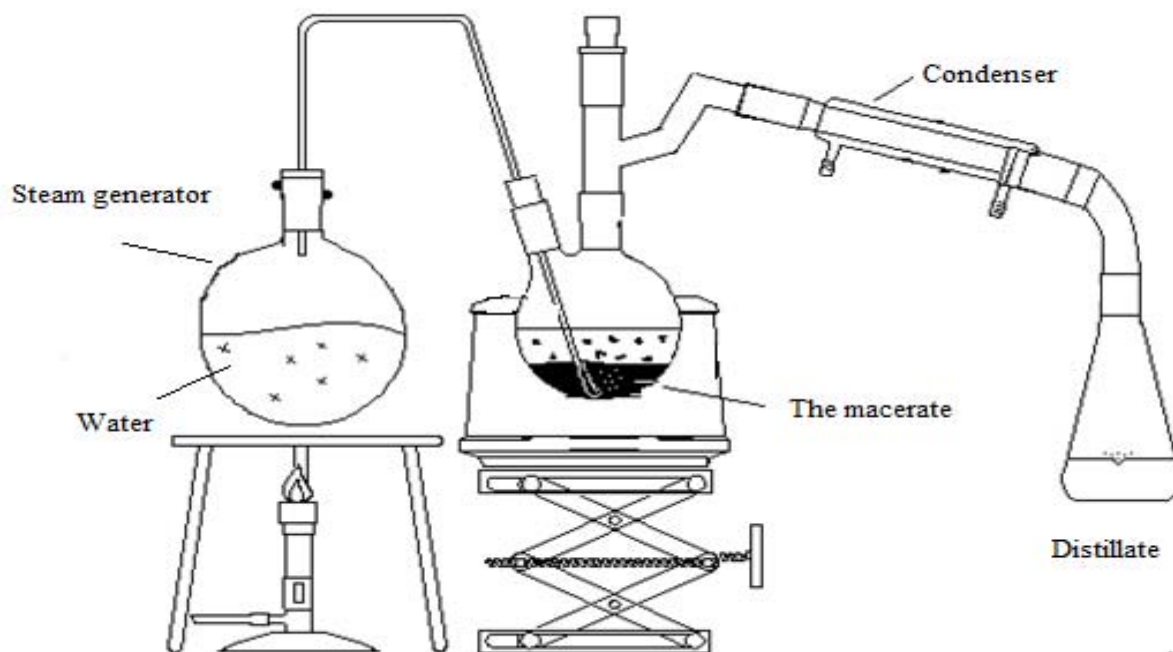

**Figure1: Steam distillation apparatus;** Vapors are formed by heating the water in the first round-bottomed flask, Steam produced are drawn into the glass tube, then leads the hydrocyanic acid released by maceration, in the second round-bottomed flask, vapors of HCN are condensed and trapped in silver nitrate.

and trapped in silver nitrate.
